# Supplementary material
Source: PubMed Central journal article supplement (PMC3662547)
Supplement: NIHMS379097-supplement-supplement_1.pdf [file NIHMS379097-supplement-supplement_1.pdf]

**Supplementary Table 1.** Final Diagnosis Among Control Subjects at 2 UPMC Hospitals

| Organ                                  | Final discharge diagnosis for control subjects (n = 401)                                                                                                                                                                                                                                                                               |
|----------------------------------------|----------------------------------------------------------------------------------------------------------------------------------------------------------------------------------------------------------------------------------------------------------------------------------------------------------------------------------------|
| Esophagus (n = 7)                      | Gastroesophageal reflux disease, 3; esophagitis, 2; hiatus hernia, 2                                                                                                                                                                                                                                                                   |
| Stomach (n = 16)                       | Gastritis, 7; cancer, 2; gastroparesis, 5; bleed, 1; ulcer, 1                                                                                                                                                                                                                                                                          |
| Duodenum (n = 11)                      | Duodenitis, 2; ulcer, 3; perforation, 6                                                                                                                                                                                                                                                                                                |
| Small bowel (n = 69)                   | Mesenteric artery thrombosis, 2; mesenteric vein thrombosis, 2; infected mesenteric cyst, 1; obstruction, 39; stenosed gastrojejunostomy, 1; gastroenteritis, 16; ischemia, 6; hernia, 1; lymphoma, 1                                                                                                                                  |
| Colon (n = 97)                         | Crohn's disease, 8; ulcerative colitis, 5; irritable bowel syndrome, 4; constipation, 15; <i>Clostridium difficile</i> colitis, 7; appendicitis, 16; diverticulitis, 14; ischemic colitis, 5; perforation, 15; ileus, 3; obstruction, 1; perirectal abscess, 1; salmonella, 1; pouchitis, 1; sinus tract, 1                            |
| Gall bladder and biliary (n = 50)      | Cholecystitis, 28; biliary dyskinesia, 5; choledocholithiasis, 6; cholelithiasis, 5; ascending cholangitis, 5; papillary stenosis, 1                                                                                                                                                                                                   |
| Pancreas (n = 3)                       | Pancreatic duct stone, 1; pancreatic cancer, 1; pancreatic pseudocyst, 1                                                                                                                                                                                                                                                               |
| Liver and spleen (n = 15)              | Ascites, 7; spontaneous bacterial peritonitis, 3; hepatocellular carcinoma, 1; perisplenic abscess, 1; splenic laceration, 1; portal vein thrombosis, 1; splenic subcapsular hematoma, 1                                                                                                                                               |
| Mesentery and retroperitoneum (n = 17) | Intra-abdominal abscess, 3; incarcerated ventral hernia, 3; peritoneal dialysis catheter peritonitis, 1; hemoperitoneum, 1; retroperitoneal abscess, 1; omental fat necrosis, 1; renal calculi, 1; ureteric calculi, 5; hydronephrosis, 1                                                                                              |
| Genitourinary (n = 20)                 | Pelvic inflammatory disease, 3; pyelonephritis, 4; adnexal mass, 1; uterine hematoma, 1; fibroid, 1; ovarian cyst, 4; ovarian abscess, 1; ovarian cancer, 1; prostatitis, 1; pelvic abscess, 2; bladder cancer, 1                                                                                                                      |
| Lungs (n = 6)                          | Pneumonia, 5; pulmonary embolism, 1                                                                                                                                                                                                                                                                                                    |
| Heart (n = 3)                          | Myocardial infarction, 1; congestive heart failure, 2                                                                                                                                                                                                                                                                                  |
| Miscellaneous (n = 87)                 | No specific etiology determined, 63; metastasis, 6; lumbar sprain, 1; lymphocele, 1; sickle cell crisis, 1; postsurgical pain, 1; no data, 7; shoulder abscess, 1; narcotic withdrawal, 1; anxiety, 1; systemic viral syndrome, 1; abdominal aortic aneurysm, 1; descending thoracic aortic dissection, 1; dyphenhydramine toxicity, 1 |
